# Supplementary material for: All-lead-free Cs 2 SnCl 6 /Cu 2 ZnSnS 4 /CuFeO 2 cascade band-aligned multilayer heterostructures for solar-driven hydrogen production from wastewater
Source: Royal Society of Chemistry journal article supplement (doi:10.1039/d5na00828j), 2025-11-24
Supplement: d5na00828j1.pdf [file d5na00828j1.pdf]

**All-lead-free Cs<sub>2</sub>SnCl<sub>6</sub>/Cu<sub>2</sub>ZnSnS<sub>4</sub>/CuFeO<sub>2</sub> cascade band-aligned multilayer  
heterostructures for solar-driven hydrogen production from wastewater**

**Amira H. Ali <sup>1</sup>, Ashour M. Ahmed <sup>2</sup>, Mohamed A. Basyooni-M. Kabatas <sup>3,4\*</sup>,  
Mamduh J. Aljaafreh <sup>2</sup>, Mohamed Shaban <sup>5</sup>, Mohamed Rabia <sup>1</sup>, Ahmed A. Abdel-  
Khaliek <sup>6</sup>**

<sup>1</sup> Nanomaterials Laboratory, Department of Chemistry, Faculty of Science, Beni-Suef  
University, Beni-Suef, Egypt

<sup>2</sup> Department of Physics, Faculty of Science, Imam Mohammad Ibn Saud Islamic  
University (IMSIU), Riyadh 11623, Saudi Arabia

<sup>3</sup> Department of Precision and Microsystems Engineering, Delft University of Technology,  
Mekelweg 2, 2628 CD Delft, The Netherlands

<sup>4</sup> Department of Nanotechnology and Advanced Materials, Graduate School of Applied and  
Natural Science, Selçuk University, Konya 42030, Turkey

<sup>5</sup> Department of Physics, Faculty of Science, Islamic University of Madinah, Madinah,  
Saudi Arabia

<sup>6</sup> Department of Chemistry, Faculty of Science, Beni-Suef University, Beni-Suef, Egypt

\* Corresponding author: M.A. B.-M. K. (m.kabatas@tudelft.nl &  
m.a.basyooni@gmail.com).

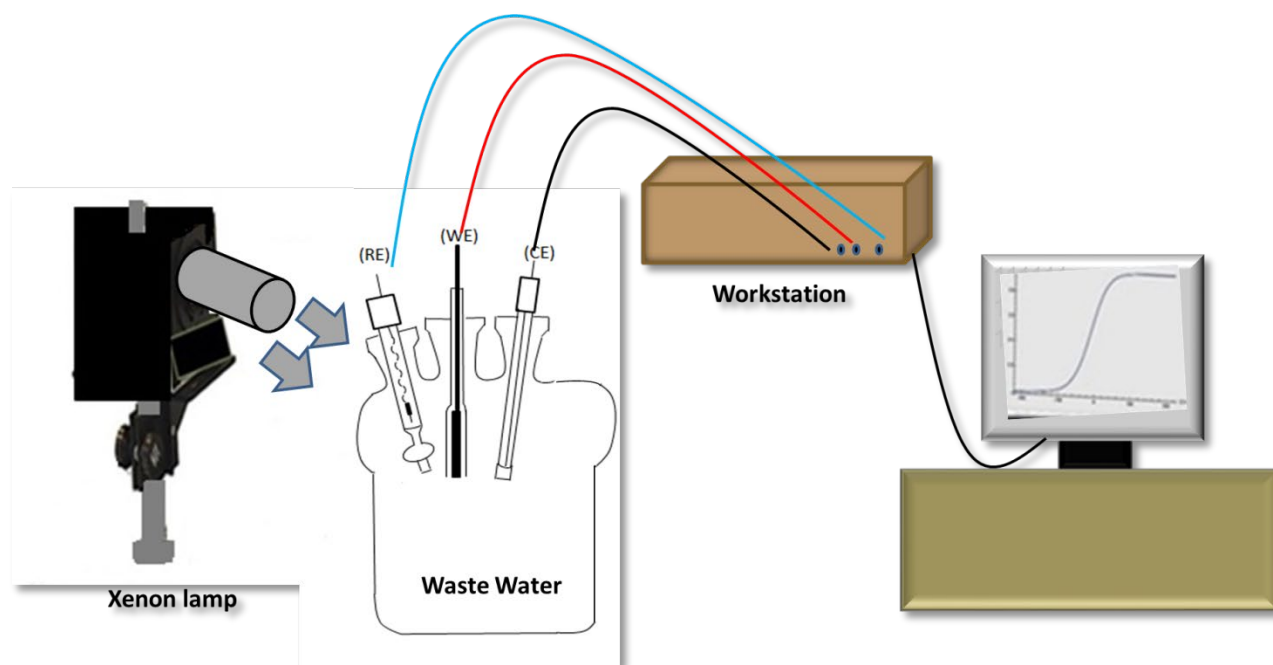

Figure S1. Schematic representation of the experimental setup used to evaluate the  $\text{CuFeO}_2/\text{Cu}_2\text{ZnSnS}_4/\text{Cs}_2\text{SnCl}_6$ -based hydrogen generation system.

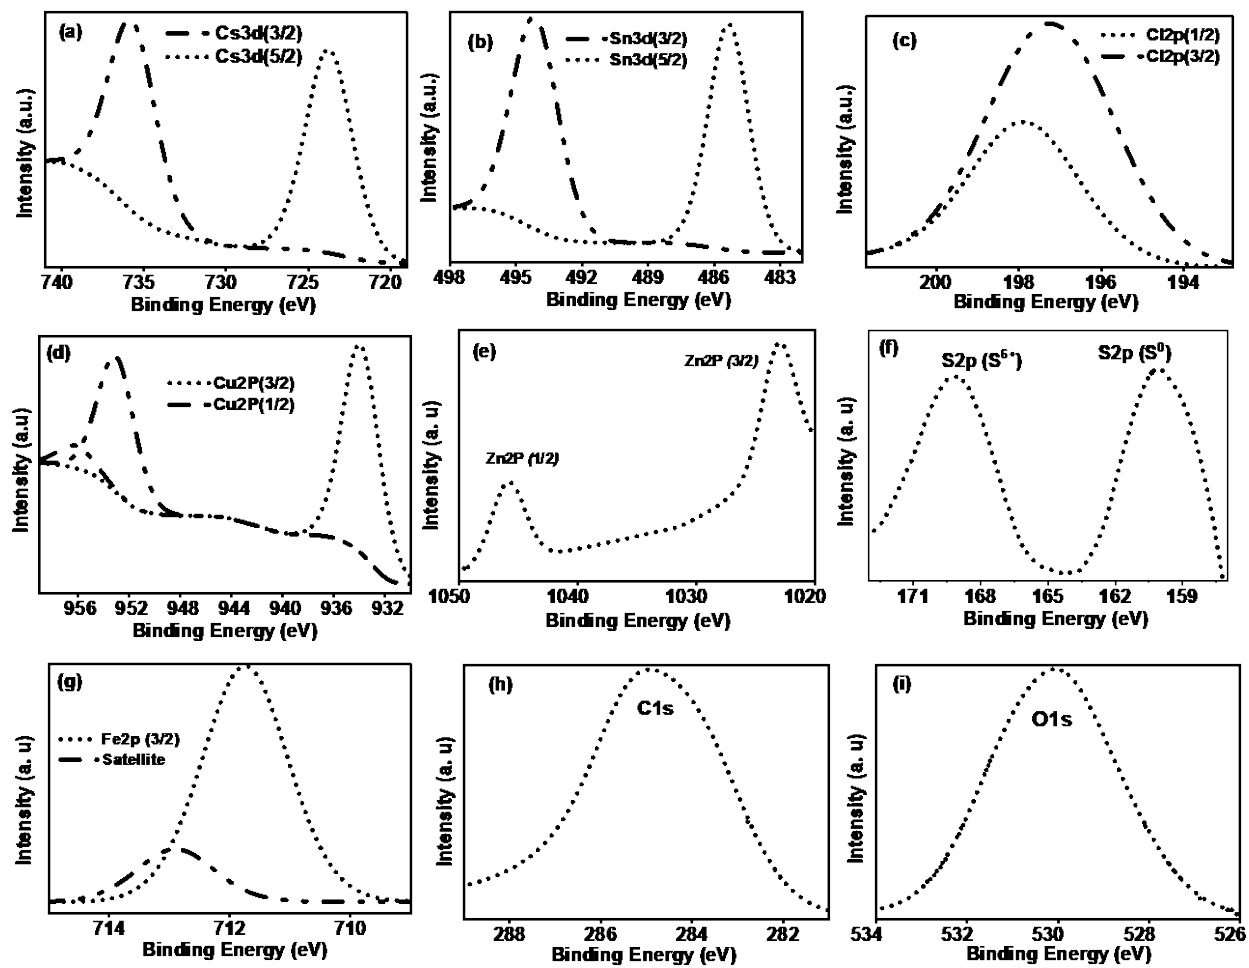

Figure S2. High-resolution XPS spectra of the  $\text{CuFeO}_2/\text{Cu}_2\text{ZnSnS}_4/\text{Cs}_2\text{SnCl}_6$  multilayers.
